# Supplementary material for: Why Wait? The Effect of Wait-Times on Subsequent Help-Seeking Among Families Looking for Children’s Mental Health Services
Source: Springer Nature journal article supplement (doi:10.1007/s10802-014-9928-z), 2014-09-01
Supplement: MOESM1 [file 542490]

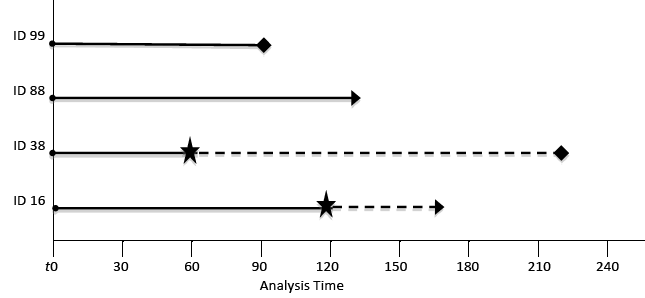


*Figure 1 (Supplementary Material)*. Comparing time-to-event data between Continuously Waiting families and Received Help families.
ID 99 did not receive help from the first agency contacted and contacted a new agency after waiting 92 days. While ID 88 also did not receive help from the first agency contacted, the parent did not contact a new agency and were still waiting for services at the last point for which information was available (i.e., 129 days after contact with the first agency). Comparatively, ID 38 and ID 16 did receive help from the first agency they contacted. ID 38 waited 60 days to receive help, but then contacted a new agency about 6 months later anyway. ID 16 waited 120 days for help but did not contact a new agency at the last point at for which information was available (i.e., 176 days).
